# Supplementary material
Source: MDPI journal article supplement (https://www.mdpi.com/search?q=molecules-24-03591)
Supplement: s001 [file molecules-24-03591-s001.pdf]

**Supplementary Table I.** List of investigated genes

|   | 1      | 2                           | 3     | 4     | 5             | 6       | 7       | 8       | 9        | 10      | 11     | 12    |
|---|--------|-----------------------------|-------|-------|---------------|---------|---------|---------|----------|---------|--------|-------|
| A | Aimp1  | Bmp2                        | Ccl11 | Ccl12 | Ccl17         | Ccl19   | Ccl2    | Ccl20   | Ccl22    | Ccl24   | Ccl3   | Ccl4  |
| B | Ccl5   | Ccl6                        | Ccl7  | Ccl9  | Ccr1          | Ccr10   | Ccr2    | Ccr3    | Ccr4     | Ccr5    | Ccr6   | Ccr8  |
| C | Cd40lg | Csf1                        | Csf2  | Csf3  | Cx3cl1        | Cx3cr1  | Cxcl1   | Cxcl10  | Cxcl11   | Cxcl12  | Cxcl2  | Cxcl6 |
| D | Cxcl9  | Cxcr2                       | Cxcr3 | Cxcr5 | Faslg         | Ifng    | Il10ra  | Il11    | Il13     | Il15    | Il16   | Il17a |
| E | Il17b  | Il17f                       | Il1a  | Il1b  | Il1r1         | Il1rn   | Il21    | Il27    | Il2rb    | Il2rg   | Il3    | Il33  |
| F | Il4    | Il5                         | Il5ra | Il6r  | Il6st         | Il7     | Cxcr1   | Lta     | Ltb      | Mif     | Nampt  | Osm   |
| G | Pf4    | RGD156<br>1905<br>predicted | Spp1  | Tnf   | Tnfrsf11<br>b | Tnfsf10 | Tnfsf11 | Tnfsf13 | Tnfsf13b | Tnfsf14 | Tnfsf4 | Vegfa |

**Supplementary Table II.** Changes in gene expression in rats colon after 21-days of experiment (comparing to control group (H $\beta$ G-)). Fold Regulation higher than 2 and statistically significant in Student's t-test *p*-value are highlighted in red (up-regulated genes) or blue (down-regulated genes).

| Position | Gene Symbol | C $\beta$ GI+   |                | C $\beta$ Gh+   |                | C $\beta$ G-    |                | H $\beta$ GI+   |                | H $\beta$ Gh+   |                |
|----------|-------------|-----------------|----------------|-----------------|----------------|-----------------|----------------|-----------------|----------------|-----------------|----------------|
|          |             | Fold Regulation | <u>p-value</u> | Fold Regulation | <u>p-value</u> | Fold Regulation | <u>p-value</u> | Fold Regulation | <u>p-value</u> | Fold Regulation | <u>p-value</u> |
| A01      | Aimp1       | 1.24            | 0.186404       | -1.00           | 0.846449       | 1.17            | 0.214941       | -1.07           | 0.428100       | -1.04           | 0.743690       |
| A02      | Bmp2        | -1.71           | 0.118709       | -1.79           | 0.055770       | -1.32           | 0.197960       | 1.00            | 0.906837       | -2.10           | 0.176906       |
| A03      | Ccl11       | 1.03            | 0.924390       | -1.58           | 0.395095       | -1.35           | 0.188443       | -1.47           | 0.241578       | -1.71           | 0.039777       |
| A04      | Ccl12       | 4.21            | 0.041559       | 3.12            | 0.023312       | 2.39            | 0.035153       | 1.11            | 0.904422       | 2.53            | 0.064302       |
| A05      | Ccl17       | 4.08            | 0.021083       | 3.56            | 0.039228       | 2.48            | 0.053750       | 1.04            | 0.862759       | 2.22            | 0.248913       |
| A06      | Ccl19       | -3.03           | 0.469728       | -1.33           | 0.404371       | 4.69            | 0.205659       | 1.84            | 0.495720       | 1.08            | 0.705410       |
| A07      | Ccl2        | 1.51            | 0.301178       | 1.45            | 0.297316       | 1.28            | 0.538500       | 1.04            | 0.730362       | 1.19            | 0.623817       |
| A08      | Ccl20       | -3.21           | 0.186954       | -2.11           | 0.521015       | -1.01           | 0.787775       | -1.23           | 0.626524       | -1.32           | 0.868496       |
| A09      | Ccl22       | 2.86            | 0.088632       | 4.48            | 0.082914       | 4.10            | 0.002350       | 1.82            | 0.113550       | 3.41            | 0.002790       |
| A10      | Ccl24       | 1.45            | 0.208562       | 1.09            | 0.713594       | 1.25            | 0.410378       | 1.26            | 0.413908       | 1.00            | 0.901697       |
| A11      | Ccl3        | 1.18            | 0.952779       | 3.70            | 0.026111       | 2.22            | 0.151804       | 1.34            | 0.478075       | 1.37            | 0.443178       |
| A12      | Ccl4        | 1.41            | 0.460608       | 2.18            | 0.116682       | 2.24            | 0.089845       | 1.25            | 0.436942       | 1.90            | 0.124458       |
| B01      | Ccl5        | 1.61            | 0.307170       | 1.18            | 0.758061       | 1.07            | 0.910042       | -1.60           | 0.187049       | 1.39            | 0.404366       |
| B02      | Ccl6        | 1.08            | 0.632674       | -1.21           | 0.167655       | -1.07           | 0.499393       | -1.27           | 0.080866       | -1.74           | 0.059605       |
| B03      | Ccl7        | 2.67            | 0.023493       | 1.95            | 0.069749       | 1.45            | 0.168158       | 1.02            | 0.812800       | -1.02           | 0.830310       |
| B04      | Ccl9        | -3.79           | 0.148390       | -1.54           | 0.630800       | 1.62            | 0.631122       | 1.39            | 0.506775       | -1.09           | 0.562609       |
| B05      | Ccr1        | 1.12            | 0.933898       | 1.48            | 0.160507       | 1.36            | 0.317930       | 1.23            | 0.537846       | 1.26            | 0.521247       |
| B06      | Ccr10       | 1.05            | 0.471003       | 1.25            | 0.428206       | 1.70            | 0.049629       | 1.67            | 0.042728       | 1.38            | 0.298215       |
| B07      | Ccr2        | 2.59            | 0.001046       | 2.21            | 0.001319       | 1.58            | 0.007059       | 1.18            | 0.248279       | 1.27            | 0.190310       |
| B08      | Ccr3        | 2.65            | 0.000708       | 2.40            | 0.001923       | 2.27            | 0.019615       | 1.40            | 0.159280       | -1.11           | 0.831013       |
| B09      | Ccr4        | 2.90            | 0.051016       | 3.15            | 0.167073       | 4.32            | 0.004054       | 2.41            | 0.100177       | 2.44            | 0.078848       |

|     |        |       |          |       |          |       |          |       |          |       |          |
|-----|--------|-------|----------|-------|----------|-------|----------|-------|----------|-------|----------|
| B10 | Ccr5   | 2.31  | 0.014062 | 2.09  | 0.007944 | 2.03  | 0.001244 | 1.31  | 0.225216 | 1.48  | 0.130059 |
| B11 | Ccr6   | -1.48 | 0.392506 | 1.20  | 0.645148 | 3.24  | 0.149329 | 1.43  | 0.548835 | 1.49  | 0.472437 |
| B12 | Ccr8   | 2.55  | 0.081220 | 2.62  | 0.217259 | 2.92  | 0.022668 | 1.77  | 0.190080 | 1.82  | 0.158388 |
| C01 | Cd40lg | -2.65 | 0.734520 | -1.05 | 0.234447 | 3.03  | 0.076185 | 1.81  | 0.269396 | 1.20  | 0.366420 |
| C02 | Csf1   | 1.61  | 0.196155 | 1.59  | 0.175630 | 1.65  | 0.155740 | 1.73  | 0.101570 | 1.36  | 0.434985 |
| C03 | Csf2   | 1.98  | 0.041730 | 1.47  | 0.093803 | 1.18  | 0.222950 | -1.17 | 0.395996 | 1.28  | 0.146535 |
| C04 | Csf3   | 1.34  | 0.311007 | 2.06  | 0.132949 | 1.08  | 0.786448 | -1.08 | 0.861728 | -1.68 | 0.053195 |
| C05 | Cx3cl1 | -1.08 | 0.703884 | -1.02 | 0.649882 | 1.09  | 0.780616 | 2.64  | 0.188064 | 1.74  | 0.357546 |
| C06 | Cx3cr1 | 1.46  | 0.173069 | 1.64  | 0.083247 | 1.90  | 0.008004 | 1.06  | 0.734798 | 1.46  | 0.113812 |
| C07 | Cxcl1  | 3.91  | 0.033031 | 4.43  | 0.056509 | 1.32  | 0.398904 | -1.02 | 0.541718 | -1.37 | 0.162276 |
| C08 | Cxcl10 | 2.07  | 0.037217 | 1.13  | 0.592742 | 1.54  | 0.119460 | 1.38  | 0.258516 | 2.69  | 0.060807 |
| C09 | Cxcl11 | 1.71  | 0.435427 | 1.15  | 0.974808 | -1.04 | 0.592500 | -1.66 | 0.189116 | 2.72  | 0.162289 |
| C10 | Cxcl12 | 1.23  | 0.572645 | -1.02 | 0.959852 | 1.10  | 0.839841 | 1.18  | 0.619576 | 1.04  | 0.884936 |
| C11 | Cxcl2  | 2.75  | 0.202564 | 14.71 | 0.172408 | 1.68  | 0.371289 | 1.86  | 0.187242 | 1.25  | 0.893985 |
| C12 | Cxcl6  | 2.81  | 0.176056 | 2.81  | 0.011158 | 1.62  | 0.032574 | -1.06 | 0.943924 | -4.65 | 0.533381 |
| D01 | Cxcl9  | 1.22  | 0.504658 | 1.40  | 0.287340 | 1.75  | 0.088462 | -1.08 | 0.696412 | 1.80  | 0.019157 |
| D02 | Cxcr2  | 3.17  | 0.016452 | 7.76  | 0.082231 | 2.18  | 0.092097 | 1.72  | 0.180580 | 2.19  | 0.026893 |
| D03 | Cxcr3  | 1.40  | 0.231676 | 1.60  | 0.187711 | 2.01  | 0.012458 | 1.55  | 0.179196 | 2.14  | 0.020113 |
| D04 | Cxcr5  | -2.38 | 0.444615 | 1.02  | 0.567649 | 3.73  | 0.045831 | 2.57  | 0.115054 | 1.61  | 0.348593 |
| D05 | Faslg  | 2.01  | 0.015447 | 2.63  | 0.004122 | 2.76  | 0.001691 | 1.50  | 0.064434 | 2.33  | 0.001802 |
| D06 | Ifng   | 1.39  | 0.118941 | 1.27  | 0.241204 | 1.37  | 0.322577 | -1.35 | 0.046611 | 1.11  | 0.512072 |
| D07 | Il10ra | 1.43  | 0.321661 | 2.44  | 0.161893 | 3.55  | 0.018503 | 3.00  | 0.044051 | 2.32  | 0.144963 |
| D08 | Il11   | 1.23  | 0.250686 | 1.70  | 0.162297 | 1.09  | 0.593185 | -1.20 | 0.361548 | -1.05 | 0.757455 |
| D09 | Il13   | 4.21  | 0.010745 | 4.33  | 0.083141 | 3.54  | 0.016831 | 2.53  | 0.261520 | 2.07  | 0.197219 |
| D10 | Il15   | 1.19  | 0.616735 | 1.06  | 0.970458 | -1.04 | 0.636887 | -1.42 | 0.118229 | -1.02 | 0.868831 |
| D11 | Il16   | 1.02  | 0.838718 | 1.42  | 0.317840 | 2.35  | 0.008879 | 1.82  | 0.085309 | 1.41  | 0.226926 |

|     |       |       |          |       |          |       |          |       |          |       |          |
|-----|-------|-------|----------|-------|----------|-------|----------|-------|----------|-------|----------|
| D12 | Il17a | 4.50  | 0.010906 | 5.51  | 0.054373 | 1.57  | 0.267657 | 1.83  | 0.093521 | -1.02 | 0.671475 |
| E01 | Il17b | 1.08  | 0.654263 | -1.06 | 0.696054 | 1.09  | 0.469745 | -1.02 | 0.999024 | -1.35 | 0.030166 |
| E02 | Il17f | 2.21  | 0.059568 | 1.64  | 0.074941 | 1.44  | 0.130293 | 1.10  | 0.898300 | -1.07 | 0.763370 |
| E03 | Il1a  | 2.12  | 0.608750 | 3.86  | 0.081802 | 1.56  | 0.840782 | 1.21  | 0.834171 | 2.51  | 0.330674 |
| E04 | Il1b  | 1.08  | 0.972163 | 2.63  | 0.120451 | 1.67  | 0.176491 | 1.22  | 0.498148 | 1.82  | 0.103701 |
| E05 | Il1r1 | 2.91  | 0.006592 | 2.10  | 0.038543 | 1.92  | 0.026736 | 1.55  | 0.129183 | 2.00  | 0.091170 |
| E06 | Il1rn | 1.31  | 0.822806 | 2.12  | 0.119818 | 2.13  | 0.110863 | 1.33  | 0.889324 | 1.02  | 0.876593 |
| E07 | Il21  | 1.62  | 0.169218 | 2.13  | 0.173768 | 4.12  | 0.072277 | 1.46  | 0.223869 | 1.09  | 0.905668 |
| E08 | Il27  | 2.18  | 0.057658 | 1.89  | 0.153718 | 1.99  | 0.026614 | 1.36  | 0.438111 | 1.23  | 0.737685 |
| E09 | Il2rb | 2.01  | 0.057812 | 2.22  | 0.048642 | 2.80  | 0.000174 | 1.64  | 0.078217 | 2.20  | 0.002112 |
| E10 | Il2rg | -1.12 | 0.994175 | 1.81  | 0.292299 | 3.52  | 0.016672 | 2.37  | 0.093913 | 1.85  | 0.227675 |
| E11 | Il3   | 1.57  | 0.088723 | 1.44  | 0.124930 | 1.39  | 0.155790 | -1.07 | 0.490430 | -1.05 | 0.865105 |
| E12 | Il33  | -1.07 | 0.693047 | -1.30 | 0.370567 | -1.10 | 0.608250 | 1.11  | 0.571855 | -2.17 | 0.049130 |
| F01 | Il4   | -1.74 | 0.202462 | -1.01 | 0.463564 | 1.76  | 0.237374 | -1.38 | 0.724167 | -1.43 | 0.411264 |
| F02 | Il5   | 2.98  | 0.004264 | 2.07  | 0.089351 | 1.58  | 0.152919 | 1.07  | 0.564846 | -1.14 | 0.662198 |
| F03 | Il5ra | -1.18 | 0.380658 | 1.57  | 0.263892 | 2.54  | 0.062425 | 2.38  | 0.089272 | 1.37  | 0.416792 |
| F04 | Il6r  | 1.32  | 0.312716 | 1.91  | 0.120517 | 2.36  | 0.005620 | 2.08  | 0.028838 | 1.66  | 0.123975 |
| F05 | Il6st | 1.91  | 0.026665 | 1.69  | 0.010026 | 1.69  | 0.003679 | 1.37  | 0.136302 | 1.30  | 0.204306 |
| F06 | Il7   | 1.19  | 0.302979 | 1.09  | 0.555028 | 1.12  | 0.401632 | -1.12 | 0.467483 | 1.22  | 0.297728 |
| F07 | Cxcr1 | 5.44  | 0.004152 | 2.12  | 0.127925 | 2.44  | 0.020985 | -1.02 | 0.993720 | 1.67  | 0.142870 |
| F08 | Lta   | -2.15 | 0.352408 | -1.39 | 0.724287 | 3.32  | 0.099230 | 1.75  | 0.191314 | 1.56  | 0.525708 |
| F09 | Ltb   | -1.43 | 0.604151 | 1.24  | 0.422368 | 3.25  | 0.025209 | 1.92  | 0.163948 | 1.24  | 0.406922 |
| F10 | Mif   | 1.57  | 0.001580 | 1.48  | 0.006498 | 1.33  | 0.013804 | 1.05  | 0.721106 | 1.24  | 0.161111 |
| F11 | Nampt | 1.05  | 0.859316 | -1.25 | 0.129365 | -1.09 | 0.387699 | 1.09  | 0.616044 | -1.12 | 0.444501 |
| F12 | Osm   | -1.08 | 0.791748 | 5.52  | 0.222872 | 3.09  | 0.002875 | 2.29  | 0.049555 | 1.59  | 0.199564 |
| G01 | Pf4   | 1.14  | 0.438423 | -1.14 | 0.823414 | -1.08 | 0.956780 | -1.43 | 0.146763 | -1.52 | 0.039122 |

|     |                      |       |          |       |          |       |          |       |          |       |          |
|-----|----------------------|-------|----------|-------|----------|-------|----------|-------|----------|-------|----------|
| G02 | RGD1561905_predicted | -1.69 | 0.267811 | -1.88 | 0.133473 | -1.96 | 0.096622 | 1.16  | 0.358967 | -2.16 | 0.091151 |
| G03 | Spp1                 | 7.55  | 0.086514 | 14.47 | 0.114119 | 2.28  | 0.032984 | -1.07 | 0.702431 | 1.98  | 0.091221 |
| G04 | Tnf                  | 1.28  | 0.580395 | 2.36  | 0.173381 | 2.83  | 0.036339 | 2.17  | 0.131467 | 1.93  | 0.277867 |
| G05 | Tnfrsf11b            | -1.35 | 0.171615 | -1.69 | 0.111053 | -1.37 | 0.096654 | -1.01 | 0.773119 | -1.42 | 0.190188 |
| G06 | Tnfsf10              | 1.65  | 0.076008 | 1.26  | 0.315122 | 1.28  | 0.280030 | 1.28  | 0.287855 | 1.62  | 0.136366 |
| G07 | Tnfsf11              | -3.78 | 0.182867 | -1.57 | 0.904464 | 2.05  | 0.462279 | 1.47  | 0.509443 | 1.22  | 0.687693 |
| G08 | Tnfsf13              | 1.30  | 0.024084 | 1.15  | 0.271207 | 1.15  | 0.201282 | 1.04  | 0.729425 | -1.22 | 0.307097 |
| G09 | Tnfsf13b             | 1.21  | 0.256790 | 1.24  | 0.154303 | 1.42  | 0.003254 | 1.12  | 0.387317 | 1.18  | 0.135255 |
| G10 | Tnfsf14              | 1.60  | 0.336967 | 2.12  | 0.176895 | 3.34  | 0.005982 | 2.60  | 0.060138 | 2.17  | 0.062094 |
| G11 | Tnfsf4               | 1.59  | 0.228004 | 1.21  | 0.624387 | 1.58  | 0.179910 | 1.03  | 0.713532 | 1.16  | 0.901454 |
| G12 | Vegfa                | -1.07 | 0.909128 | -1.15 | 0.886766 | -1.08 | 0.812251 | 1.11  | 0.691151 | -1.16 | 0.576638 |

**Supplementary Table III.** Changes in gene expression in rats colon after 21-days of experiment (comparing to TNBS-colitis induced group (CβG-)). Fold Regulation higher than 2 and statistically significant in Student's t-test *p*-value are highlighted in red (up-regulated genes) or blue (down-regulated genes).

| Position | Gene Symbol | CβGI+           |                | CβGh+           |                |
|----------|-------------|-----------------|----------------|-----------------|----------------|
|          |             | Fold Regulation | <u>p-value</u> | Fold Regulation | <u>p-value</u> |
| A01      | Aimp1       | 1.06            | 0.740850       | -1.17           | 0.391242       |
| A02      | Bmp2        | -1.30           | 0.535977       | -1.36           | 0.376709       |
| A03      | Ccl11       | 1.39            | 0.177341       | -1.17           | 0.871778       |
| A04      | Ccl12       | 1.76            | 0.117710       | 1.31            | 0.264688       |
| A05      | Ccl17       | 1.65            | 0.334025       | 1.44            | 0.367066       |
| A06      | Ccl19       | -14.22          | 0.223340       | -6.24           | 0.618256       |
| A07      | Ccl2        | 1.18            | 0.721449       | 1.14            | 0.558107       |
| A08      | Ccl20       | -3.16           | 0.150466       | -2.08           | 0.641272       |
| A09      | Ccl22       | -1.43           | 0.768409       | 1.09            | 0.530900       |
| A10      | Ccl24       | 1.16            | 0.696311       | -1.15           | 0.632146       |
| A11      | Ccl3        | -1.88           | 0.178999       | 1.67            | 0.127991       |
| A12      | Ccl4        | -1.59           | 0.272300       | -1.03           | 0.739761       |
| B01      | Ccl5        | 1.50            | 0.222998       | 1.10            | 0.548467       |
| B02      | Ccl6        | 1.16            | 0.305008       | -1.12           | 0.255575       |
| B03      | Ccl7        | 1.84            | 0.064356       | 1.34            | 0.261225       |
| B04      | Ccl9        | -6.14           | 0.019536       | -2.50           | 0.291978       |
| B05      | Ccr1        | -1.22           | 0.255324       | 1.09            | 0.374408       |
| B06      | Ccr10       | -1.62           | 0.468996       | -1.36           | 0.282362       |
| B07      | Ccr2        | 1.64            | 0.018821       | 1.40            | 0.052748       |
| B08      | Ccr3        | 1.17            | 0.696514       | 1.06            | 0.912485       |
| B09      | Ccr4        | -1.49           | 0.283123       | -1.37           | 0.851653       |

|     |        |       |          |       |          |
|-----|--------|-------|----------|-------|----------|
| B10 | Ccr5   | 1.14  | 0.439528 | 1.03  | 0.687145 |
| B11 | Ccr6   | -4.81 | 0.074588 | -2.70 | 0.337902 |
| B12 | Ccr8   | -1.14 | 0.762314 | -1.11 | 0.668351 |
| C01 | Cd40lg | -8.01 | 0.123867 | -3.18 | 0.931046 |
| C02 | Csf1   | -1.02 | 0.828170 | -1.04 | 0.976277 |
| C03 | Csf2   | 1.68  | 0.090314 | 1.24  | 0.298239 |
| C04 | Csf3   | 1.25  | 0.356120 | 1.91  | 0.143683 |
| C05 | Cx3cl1 | -1.18 | 0.893053 | -1.11 | 0.835683 |
| C06 | Cx3cr1 | -1.30 | 0.258445 | -1.16 | 0.641834 |
| C07 | Cxcl1  | 2.96  | 0.092824 | 3.35  | 0.092887 |
| C08 | Cxcl10 | 1.35  | 0.363263 | -1.36 | 0.255854 |
| C09 | Cxcl11 | 1.77  | 0.123300 | 1.19  | 0.451247 |
| C10 | Cxcl12 | 1.12  | 0.670149 | -1.11 | 0.805613 |
| C11 | Cxcl2  | 1.64  | 0.691038 | 8.75  | 0.187978 |
| C12 | Cxcl6  | 1.74  | 0.275925 | 1.74  | 0.082934 |
| D01 | Cxcl9  | -1.43 | 0.597635 | -1.25 | 0.477467 |
| D02 | Cxcr2  | 1.46  | 0.436695 | 3.57  | 0.115642 |
| D03 | Cxcr3  | -1.43 | 0.611421 | -1.25 | 0.590020 |
| D04 | Cxcr5  | -8.88 | 0.033396 | -3.65 | 0.381845 |
| D05 | Faslg  | -1.37 | 0.279653 | -1.05 | 0.837438 |
| D06 | Ifng   | 1.01  | 0.748147 | -1.08 | 0.587615 |
| D07 | Il10ra | -2.49 | 0.222526 | -1.45 | 0.521189 |
| D08 | Il11   | 1.13  | 0.425045 | 1.56  | 0.189898 |
| D09 | Il13   | 1.19  | 0.632808 | 1.22  | 0.355023 |
| D10 | Il15   | 1.24  | 0.023367 | 1.10  | 0.104386 |
| D11 | Il16   | -2.31 | 0.051771 | -1.66 | 0.509454 |

|     |       |       |          |       |          |
|-----|-------|-------|----------|-------|----------|
| D12 | Il17a | 2.87  | 0.089601 | 3.52  | 0.114280 |
| E01 | Il17b | -1.02 | 0.755154 | -1.16 | 0.331261 |
| E02 | Il17f | 1.53  | 0.138655 | 1.13  | 0.418447 |
| E03 | Il1a  | 1.36  | 0.695152 | 2.48  | 0.087604 |
| E04 | Il1b  | -1.54 | 0.247687 | 1.58  | 0.256200 |
| E05 | Il1r1 | 1.51  | 0.125730 | 1.09  | 0.472645 |
| E06 | Il1rn | -1.63 | 0.148316 | -1.01 | 0.635822 |
| E07 | Il21  | -2.54 | 0.185901 | -1.94 | 0.468437 |
| E08 | Il27  | 1.09  | 0.515695 | -1.06 | 0.862638 |
| E09 | Il2rb | -1.39 | 0.465141 | -1.26 | 0.614262 |
| E10 | Il2rg | -3.93 | 0.052633 | -1.95 | 0.514999 |
| E11 | Il3   | 1.13  | 0.272016 | 1.03  | 0.718182 |
| E12 | Il33  | 1.03  | 0.938560 | -1.18 | 0.598286 |
| F01 | Il4   | -3.08 | 0.180876 | -1.78 | 0.674498 |
| F02 | Il5   | 1.89  | 0.039275 | 1.31  | 0.299342 |
| F03 | Il5ra | -2.99 | 0.069435 | -1.62 | 0.230183 |
| F04 | Il6r  | -1.79 | 0.269169 | -1.24 | 0.612609 |
| F05 | Il6st | 1.13  | 0.355965 | -1.00 | 0.903558 |
| F06 | Il7   | 1.06  | 0.534381 | -1.03 | 0.791216 |
| F07 | Cxcr1 | 2.23  | 0.053990 | -1.15 | 0.720578 |
| F08 | Lta   | -7.15 | 0.041973 | -4.61 | 0.321846 |
| F09 | Ltb   | -4.65 | 0.035946 | -2.61 | 0.296937 |
| F10 | Mif   | 1.18  | 0.043769 | 1.11  | 0.242965 |
| F11 | Nampt | 1.14  | 0.181517 | -1.14 | 0.225455 |
| F12 | Osm   | -3.35 | 0.032674 | 1.79  | 0.303651 |
| G01 | Pf4   | 1.24  | 0.451304 | -1.06 | 0.882767 |

|     |                      |       |          |       |          |
|-----|----------------------|-------|----------|-------|----------|
| G02 | RGD1561905_predicted | 1.16  | 0.551272 | 1.04  | 0.783228 |
| G03 | Spp1                 | 3.31  | 0.130653 | 6.35  | 0.124791 |
| G04 | Tnf                  | -2.21 | 0.261655 | -1.20 | 0.916888 |
| G05 | Tnfrsf11b            | 1.01  | 0.965383 | -1.23 | 0.699850 |
| G06 | Tnfsf10              | 1.29  | 0.374466 | -1.02 | 0.996695 |
| G07 | Tnfsf11              | -7.76 | 0.050934 | -3.23 | 0.445767 |
| G08 | Tnfsf13              | 1.13  | 0.195955 | -1.00 | 0.934611 |
| G09 | Tnfsf13b             | -1.18 | 0.709282 | -1.15 | 0.313742 |
| G10 | Tnfsf14              | -2.08 | 0.066818 | -1.57 | 0.328659 |
| G11 | Tnfsf4               | 1.00  | 0.956135 | -1.31 | 0.312138 |
| G12 | Vegfa                | -1.07 | 0.909128 | -1.15 | 0.886766 |
